# Supplementary material
Source: PubMed Central journal article supplement (PMC6715109)
Supplement: awx374_brain-2017-01004-file002.pdf [file awx374_brain-2017-01004-file002.pdf]

**Supplementary table 1 Subject demographic data.** Data is based on available clinical reports.

| ID  | Age | Gender | Seizure type <sup>a</sup> | MRI <sup>b</sup>                      | Electrode type | Channel Number | Anatomical location of the SOZ <sup>c</sup> | Functional region identified by DCS | Day of the fist seizure | Surgical outcome <sup>d</sup> |
|-----|-----|--------|---------------------------|---------------------------------------|----------------|----------------|---------------------------------------------|-------------------------------------|-------------------------|-------------------------------|
| P1  | 30  | M      | FAS                       | RMTS                                  | Depth, strip   | 28             | RAH                                         | /                                   | Day 5                   | I                             |
| P2  | 32  | F      | FAS                       | Normal                                | Depth, strip   | 56             | LA, LAH, LPH, RA, RAH, RPH                  | /                                   | Day 4                   | I*                            |
| P3  | 37  | M      | FIAS                      | LMTS                                  | Depth, grid    | 54             | LA, LAT                                     | /                                   | Day2                    | I                             |
| P4  | 15  | F      | FAS                       | TS                                    | Depth          | 74             | AMF, PMF                                    | /                                   | Day3                    | II                            |
| P5  | 18  | F      | FAS                       | LMTS                                  | Depth          | 64             | LPH, left uncus, left occipital-temporal    | /                                   | Day2                    | I                             |
| P6  | 35  | F      | FIAS                      | Left temporal grey matter heterotopia | Grid, strip    | 64             | LST                                         | /                                   | Day3                    | I                             |
| P7  | 32  | M      | FIAS                      | RMTS                                  | Grid, strip    | 48             | Right temporal, LST, LLT, RAST, RPST        | /                                   | Day1                    | I                             |
| P8  | 53  | F      | FAS                       | Normal                                | Grid, strip    | 40             | LAT, LST, RAT, RPT                          | /                                   | Day1                    | II*                           |
| P9  | 36  | F      | FAS                       | Normal                                | Grid           | 66             | Left parietal-temporal                      | Hand                                | Day3                    | I                             |
| P10 | 3   | M      | FAS                       | CM                                    | Grid           | 64             | Left frontal                                | Broca's area                        | Day2                    | I                             |
| P11 | 36  | F      | FIAS                      | RMTS                                  | Grid, strip    | 72             | AST, PST                                    | Sensory                             | Day1                    | I                             |
| P12 | 49  | F      | FAS                       | Normal                                | Grid           | 54             | Left cingulate gyrus                        | Hand, mouth, sensory                | /                       | /                             |
| P13 | 36  | F      | FAS                       | Normal                                | Grid           | 120            | Left temporal                               | Hand                                | /                       | /                             |
| C1  | 53  | M      | /                         | Right parietal LGG                    | Grid           | 32             | /                                           | Hand                                | /                       | /                             |
| C2  | 30  | M      | /                         | Left posterior frontal LGG            | Grid           | 113            | /                                           | Hand                                | /                       | /                             |
| C3  | 40  | F      | /                         | Left frontal LGG                      | Grid           | 120            | /                                           | Hand                                | /                       | /                             |
| C4  | 42  | F      | /                         | Right frontal LGG                     | Grid           | 120            | /                                           | Sensory                             | /                       | /                             |

|    |    |   |   |                                |      |     |   |      |   |   |
|----|----|---|---|--------------------------------|------|-----|---|------|---|---|
| C5 | 45 | F | / | Right posterior<br>frontal LGG | Grid | 120 | / | Hand | / | / |
|----|----|---|---|--------------------------------|------|-----|---|------|---|---|

<sup>a</sup> FAS: focal aware seizure, previously known as simple focal seizure; FIAS: focal impaired awareness seizure, previously known as complex focal seizure.

<sup>b</sup> L/RMTS: left/right mesial temporal sclerosis; TS: tuberous sclerosis; CM: cavernous malformation; LGG: low-grade glioma.

<sup>c</sup> L/RA: left/right amygdala; L/RAH: left/right anterior hippocampus; L/RPH: left/right posterior hippocampus; L/RAT: left/right anterior temporal; L/RPT: left/right posterior temporal; A/PMF: anterior/posterior middle frontal gyrus; L/RST: left/right sub-temporal; A/PST: anterior/posterior sub-temporal.

<sup>d</sup> Surgical outcome is measured by Engel Classification <sup>31</sup>. Class I: free from disabling seizures. Class II: Rare disabling seizures (almost “seizure-free”).

\* P2 was completely seizure free after intracranial depth electrode monitoring without any additional surgery; resection surgery was not performed in this patient. P8 has been treated with responsive neural stimulation system. The patient has received a significant reduction of seizure frequency since the device implantation.
